# Supplementary material
Source: PubMed Central journal article supplement (PMC7148170)

A

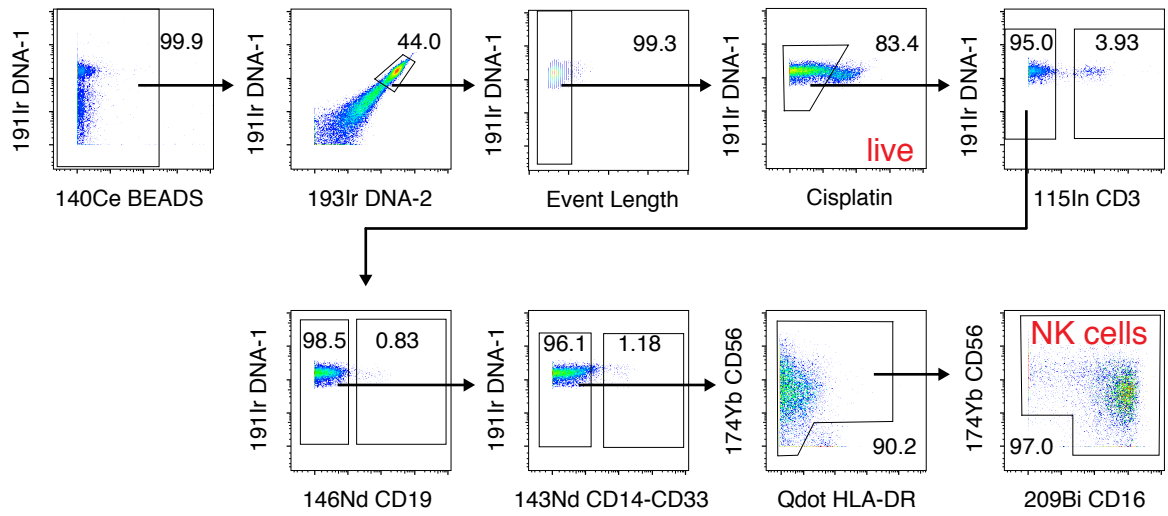

B

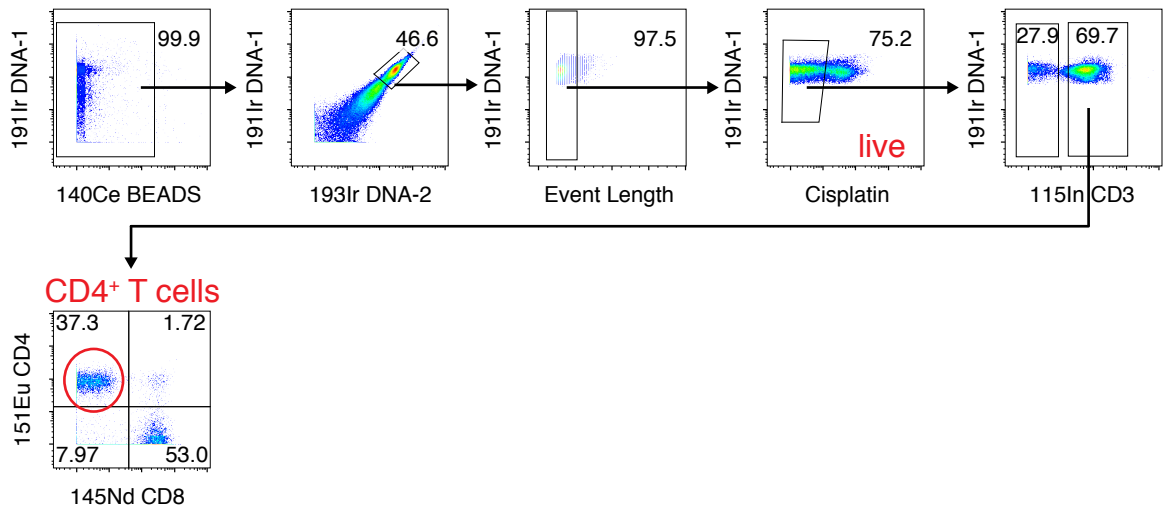

C

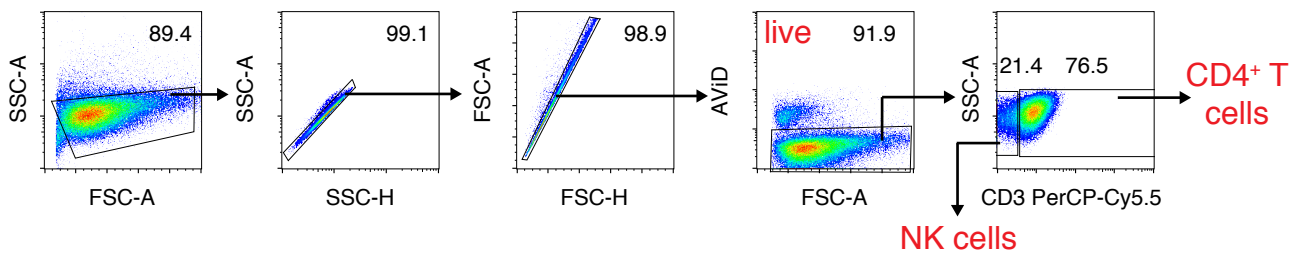

Supplement: NIHMS1557490-supplement-Figure_S1.pdf [file NIHMS1557490-supplement-Figure_S1.pdf]

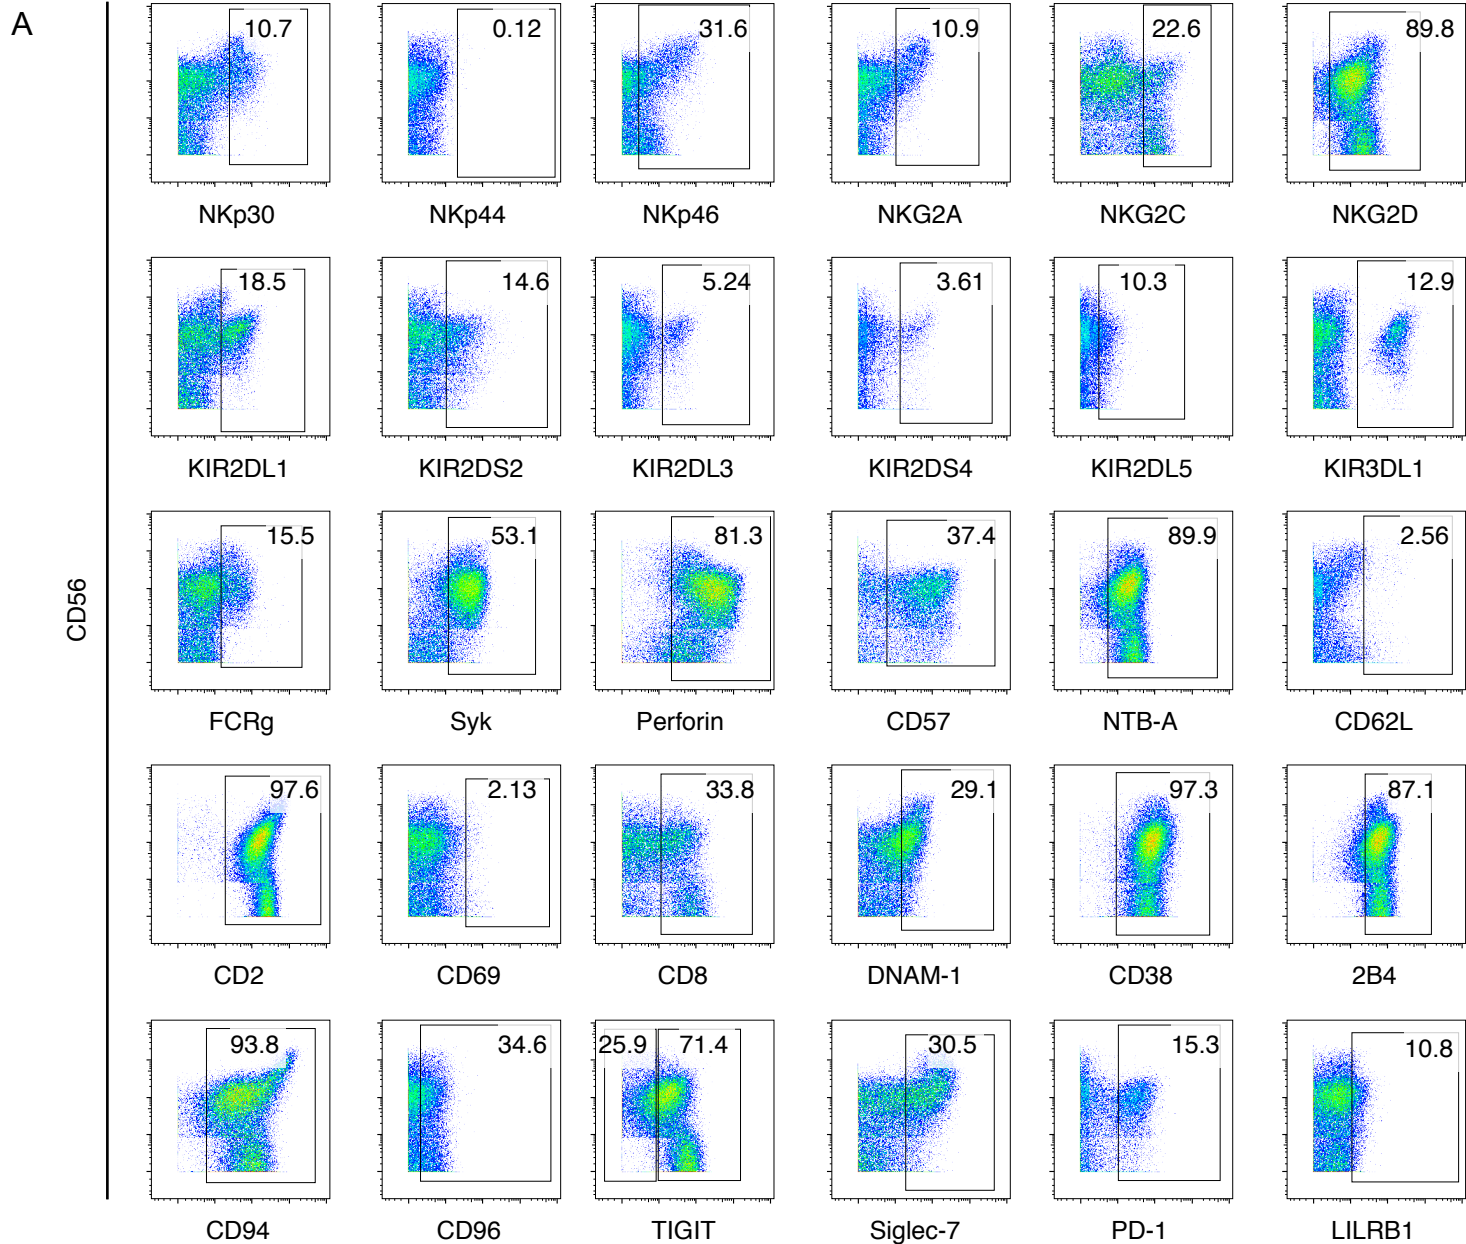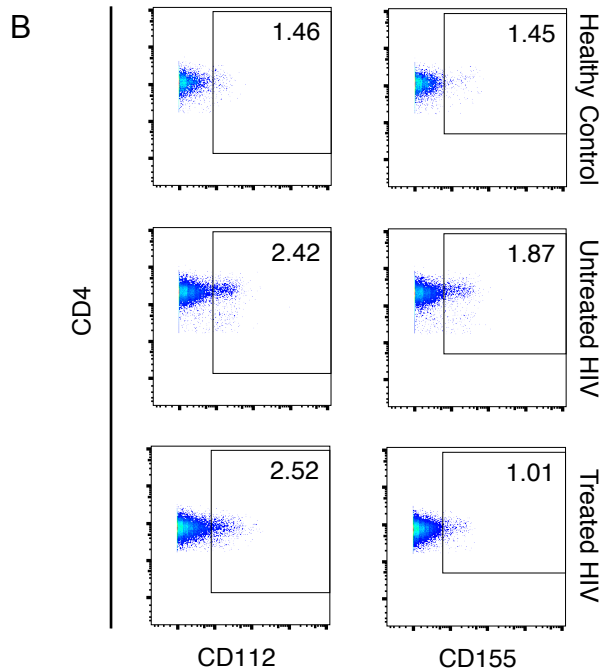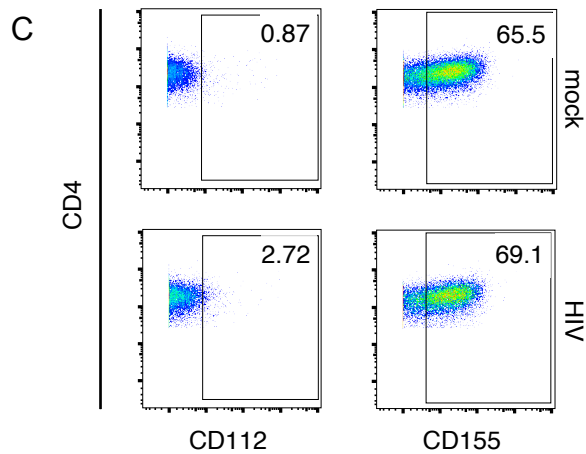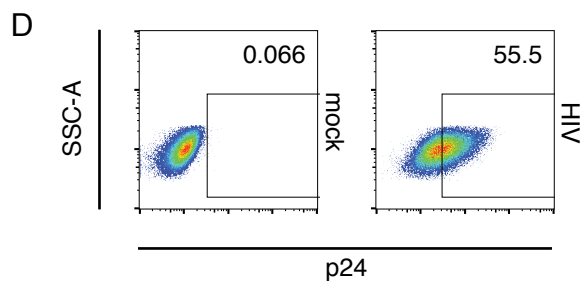

FIGURE S2

Supplement: NIHMS1557490-supplement-Figure_S2.pdf [file NIHMS1557490-supplement-Figure_S2.pdf]

A

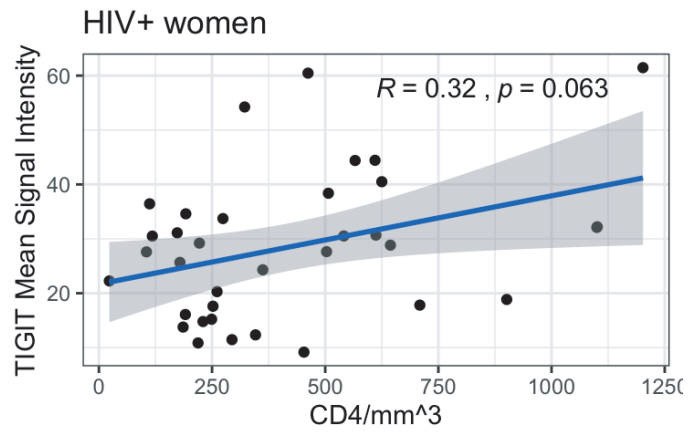

B

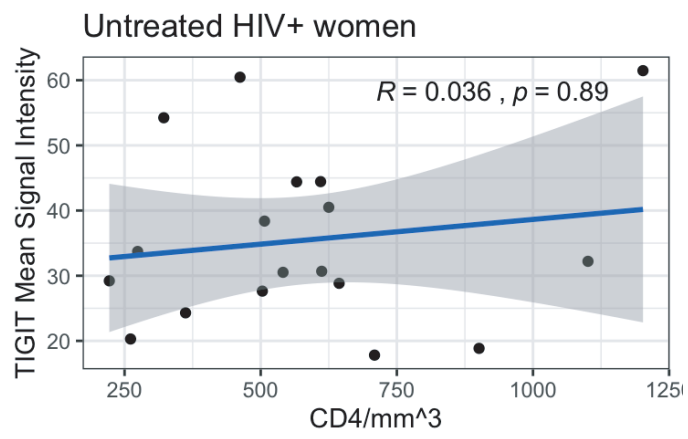

C

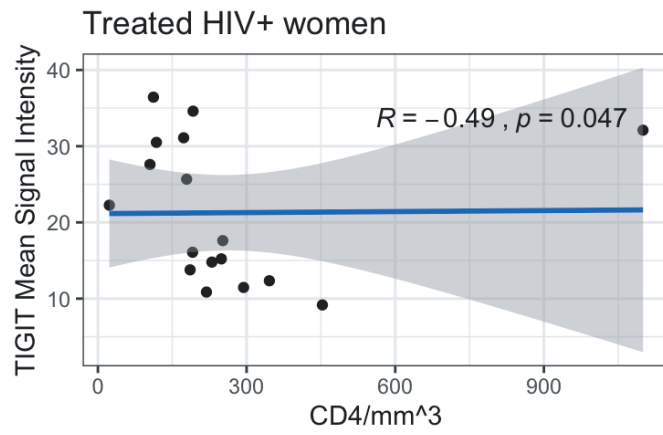

Supplement: NIHMS1557490-supplement-Figure_S3.pdf [file NIHMS1557490-supplement-Figure_S3.pdf]

A

control

isotype

TIGIT block

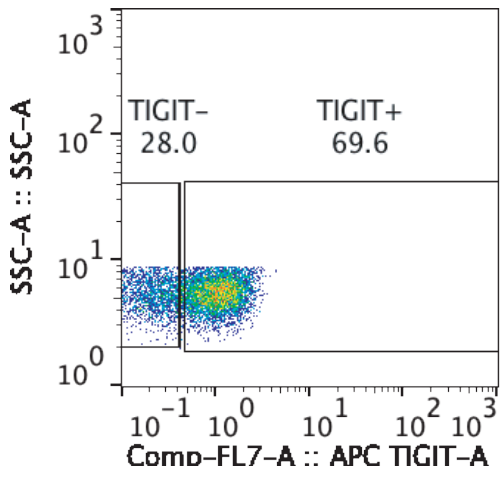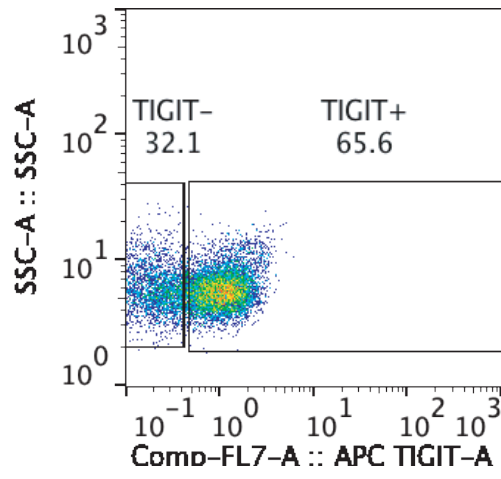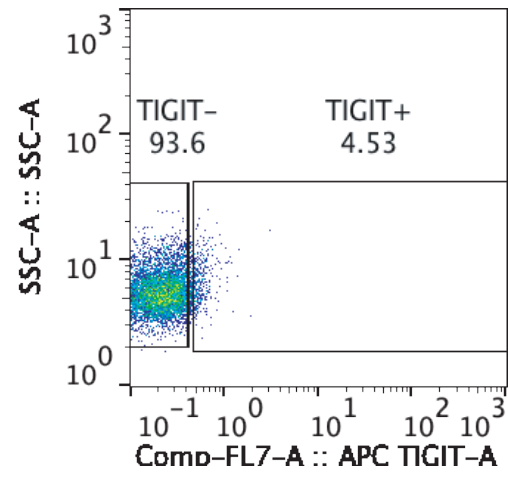

B

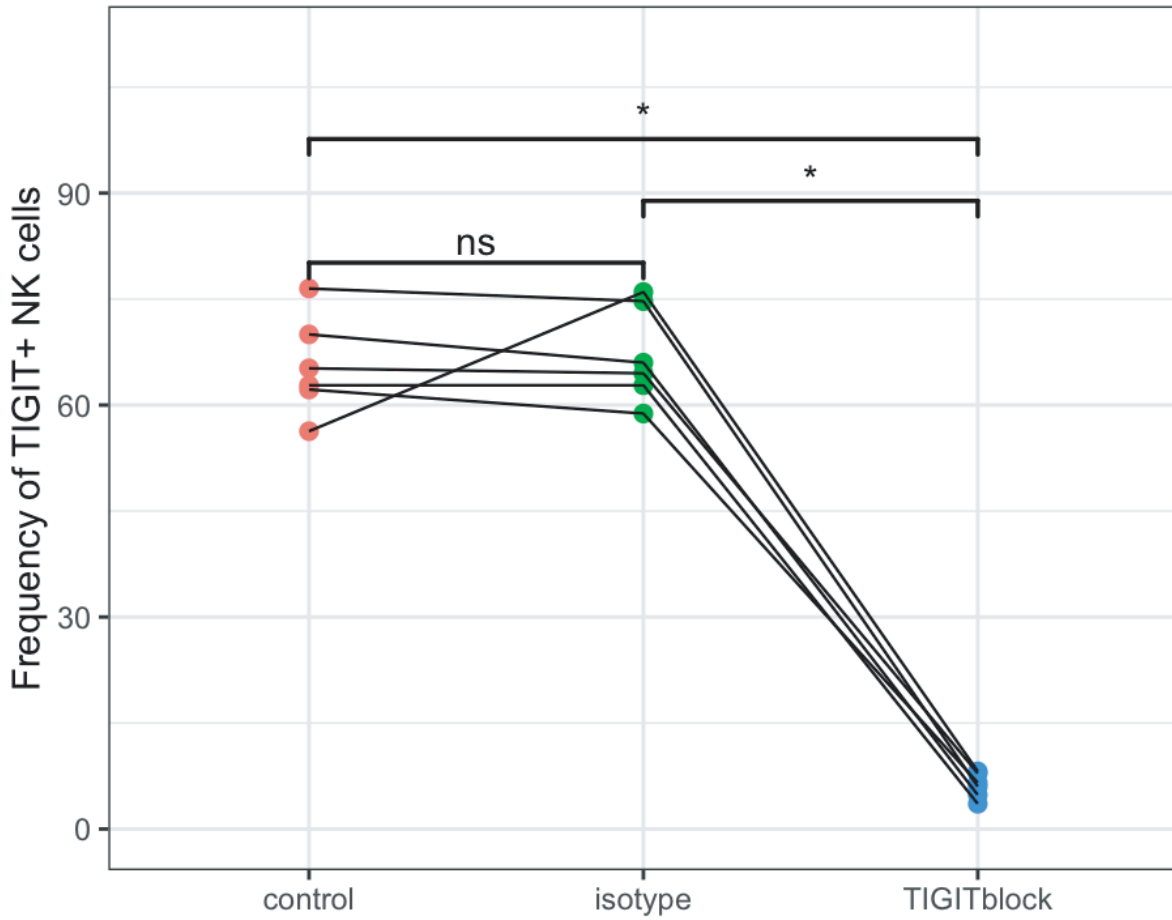

Supplement: NIHMS1557490-supplement-Figure_S4.pdf [file NIHMS1557490-supplement-Figure_S4.pdf]

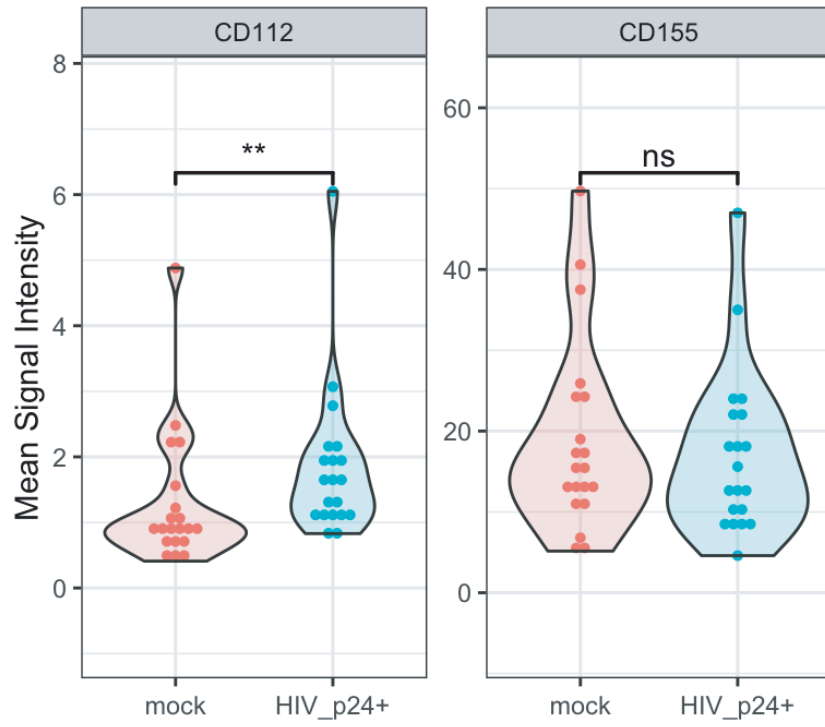

Supplement: NIHMS1557490-supplement-Figure_S5.pdf [file NIHMS1557490-supplement-Figure_S5.pdf]

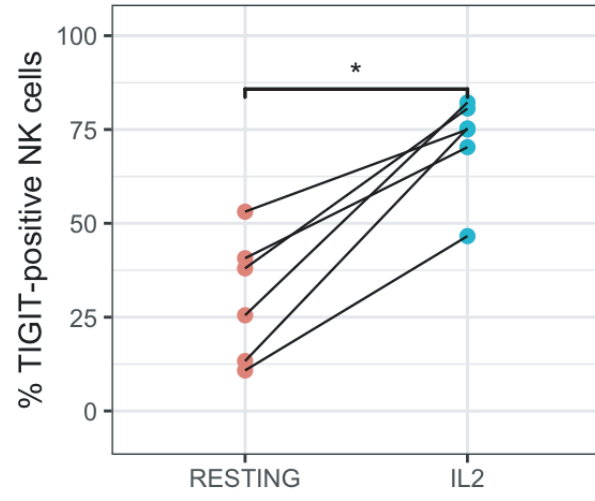

Supplement: NIHMS1557490-supplement-Figure_S6.pdf [file NIHMS1557490-supplement-Figure_S6.pdf]
